# Supplementary material for: Angiographic and Procedural Characteristics in Frail Older Patients with Non-ST Elevation Acute Coronary Syndrome
Source: PubMed Central journal article supplement — Interv Cardiol. 2023 Feb 17;18:e04. doi: 10.15420/icr.2022.20 (PMC10442670; doi:10.15420/icr.2022.20), 2023-02-17
Supplement: icr-18-e04-Supp.pdf [file icr-18-e04-Supp.pdf]

# **Angiographic and Procedural Characteristics in Frail Older Patients with Non-ST Elevation Acute Coronary Syndrome**

Benjamin Beska, Hanna Ratcovich, Alan Bagnall, Amy Burrell, Richard Edwards, Mohaned Egred, Rebecca Jordan, Amina Khan, Greg B Mills, Emma Morrison, Daniell Edward Raharjo, Fateh Singh, Chris Wilkinson, Azfar Zaman, Vijay Kunadian

## **Supplementary Material**

**Supplementary Figure 1.** Flow diagram of ICON1 screening, recruitment, and angiographic sub-study analysis. ACS: acute coronary syndrome. \* Technical issues refer to insurmountable issues with data encoded on compact discs containing angiographic data, including but not limited to missing frames of importance, corrupted discs, etc.

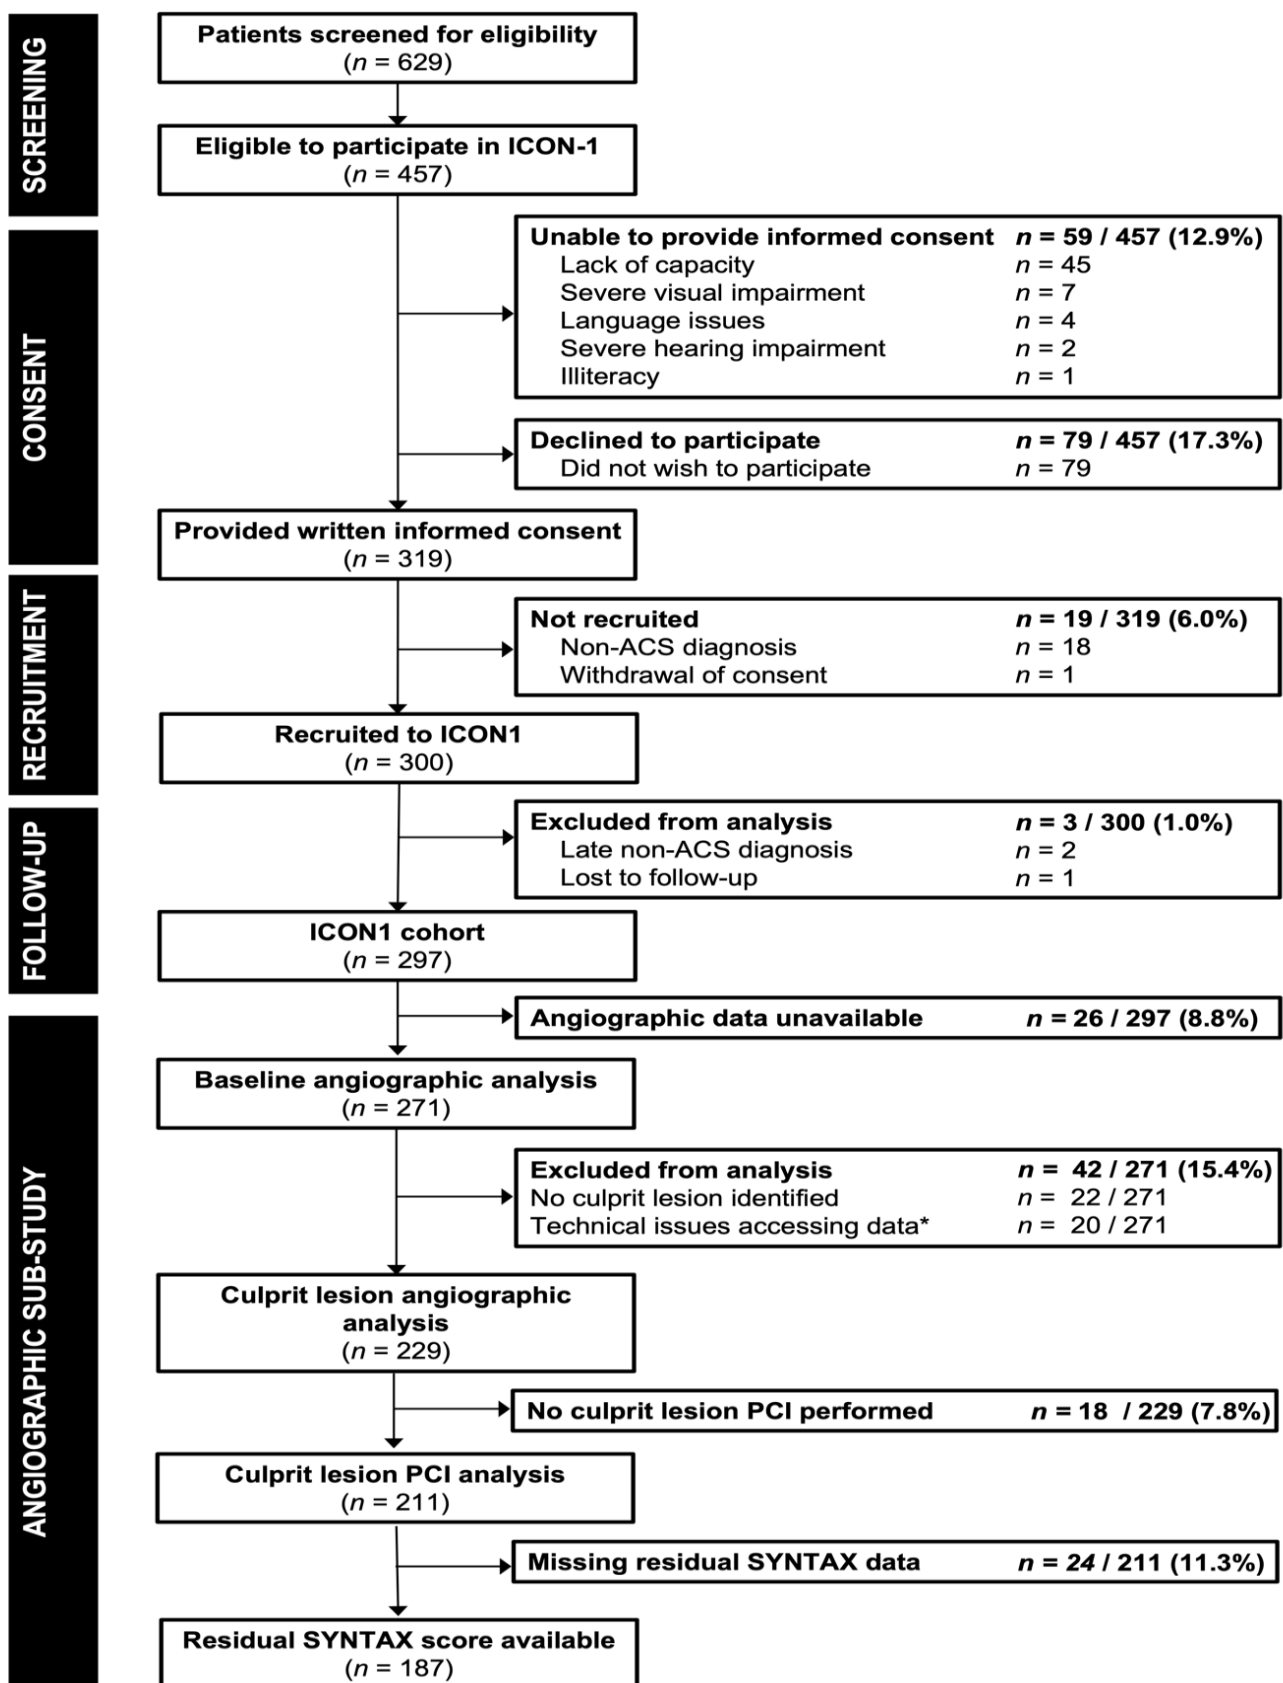

**Supplementary Table 1.** Baseline medication history stratified by frailty phenotype

| Medication history, *     | Total<br>(n=271) | Robust<br>(n=53) | Pre-Frail<br>(n=145) | Frail<br>(n=73) | <i>P</i> value |
|---------------------------|------------------|------------------|----------------------|-----------------|----------------|
| Aspirin                   | 269 (99.3)       | 53 (100)         | 143 (98.6)           | 73 (100)        | 0.42           |
| Clopidogrel               | 115 (57.2)       | 30 (56.6)        | 81 (55.9)            | 44 (60.3)       | 0.82           |
| Prasugrel                 | 2 (0.7)          | 0                | 1 (0.7)              | 1 (1.4)         | 0.67           |
| Ticagrelor                | 107 (39.5)       | 21 (39.6)        | 61 (42.1)            | 25 (34.2)       | 0.54           |
| Statin                    | 261 (96.3)       | 51 (96.2)        | 139 (95.9)           | 71 (97.3)       | 0.87           |
| ACE inhibitor or ARB      | 238 (87.8)       | 49 (92.5)        | 129 (89.0)           | 60 (82.2)       | 0.18           |
| Beta blocker              | 220 (81.2)       | 40 (75.5)        | 125 (86.2)           | 55 (75.3)       | 0.08           |
| Calcium channel blocker   | 86 (31.7)        | 20 (37.7)        | 46 (31.7)            | 20 (27.4)       | 0.47           |
| Warfarin                  | 16 (5.9)         | 2 (3.8)          | 8 (5.5)              | 6 (8.2)         | 0.56           |
| Direct oral anticoagulant | 8 (3.0)          | 0                | 4 (2.8)              | 4 (5.5)         | 0.20           |

Statistically significant ( $P \leq 0.05$ ) results are indicated in **bold**. \* Indicates medications being taken at time of referral to tertiary referral centre.

ACE = angiotensin converting enzyme; ARB = angiotensin receptor blocker.

**Supplementary Table 2.** Post-PCI culprit lesion quantitative angiographic analysis stratified by frailty phenotype

|                                                            | <b>Total</b><br>(n=211) | <b>Robust</b><br>(n=42) | <b>Pre-Frail</b><br>(n=110) | <b>Frail</b><br>(n=59) | <i>P value</i> |
|------------------------------------------------------------|-------------------------|-------------------------|-----------------------------|------------------------|----------------|
| Culprit lesion diameter stenosis, mean % ( $\pm$ SD)       | 13.7 (8.8)              | 22.8 (5.9)              | 13.4 (7.8)                  | 15.4 (11.7)            | 0.12           |
| Culprit lesion vessel diameter, mean mm ( $\pm$ SD)        | 3.13 (0.85)             | 3.1 (0.51)              | 3.06 (0.61)                 | 3.3 (1.29)             | 0.28           |
| Culprit lesion area, mean mm <sup>2</sup> ( $\pm$ SD)      | 24.5 (12.8)             | 21.5 (10.1)             | 24.5 (11.5)                 | 26.8 (16.4)            | 0.15           |
| Culprit lesion minimum lumen diameter, mean mm ( $\pm$ SD) | 2.7 (0.6)               | 2.81 (0.5)              | 2.69 (0.61)                 | 2.7 (0.63)             | 0.54           |

Statistically significant ( $P \leq 0.05$ ) results are indicated in **bold**.

**Supplementary Table 3.** Peri-procedural complications stratified by frailty

phenotype

|                                             | <b>Total</b><br>(n=211) | <b>Robust</b><br>(n=42) | <b>Pre-Frail</b><br>(n=110) | <b>Frail</b><br>(n=59) | <i>P value</i> |
|---------------------------------------------|-------------------------|-------------------------|-----------------------------|------------------------|----------------|
| <b>Peri-procedural complication,* n (%)</b> | 12 (5.7)                | 2 (4.8)                 | 8 (7.3)                     | 2 (3.4)                | 0.56           |
| No re-flow                                  | 4 (1.9)                 | 0 (0)                   | 4 (3.6)                     | 0 (0)                  | 0.42           |
| Dissection                                  | 1 (0.5)                 | 1 (2.4)                 | 0 (0)                       | 0 (0)                  | 0.53           |
| Distal embolization                         | 1 (0.5)                 | 0 (0)                   | 1 (0.9)                     | 0 (0)                  | 0.90           |
| Abrupt closure                              | 2 (1.0)                 | 0 (0)                   | 1 (0.9)                     | 1 (1.7)                | 0.93           |
| Thrombus                                    | 3 (1.4)                 | 2 (4.8)                 | 1 (0.9)                     | 0 (0)                  | 0.34           |
| Perforation                                 | 1 (0.5)                 | 0 (0)                   | 0 (0)                       | 1 (1.7)                | 0.61           |
| Loss of side branch                         | 3 (1.4)                 | 0 (0)                   | 2 (1.8)                     | 1 (1.7)                | 0.93           |

Statistically significant ( $P \leq 0.05$ ) results are indicated in **bold**. \* Records number of patients which had a peri-procedural complication, not total number of complications.

One robust patient had both a dissection and thrombus, and one frail patient had both a perforation and abrupt closure.

**Supplementary Table 4.** Logistic regression models for the association between frailty and angiographic characteristics, with full adjustment.

| Variable                            | Frail vs. Robust <sup>#</sup> |                |                          |                |                                                                    |                |
|-------------------------------------|-------------------------------|----------------|--------------------------|----------------|--------------------------------------------------------------------|----------------|
|                                     | Unadjusted                    |                | Adjusted for age and sex |                | Adjusted for differences in baseline characteristics* <sup>#</sup> |                |
|                                     | OR<br>(95% CI)                | <i>P</i> value | OR<br>(95% CI)           | <i>P</i> value | OR<br>(95% CI)                                                     | <i>P</i> value |
| Femoral access                      | 3.98<br>(1.28–12.5)           | 0.017          | 4.42<br>(0.83–34.4)      | 0.082          | 3.96<br>(0.56– 28.0)                                               | 0.167          |
| Radial access                       | 0.25<br>(0.08–0.78)           | 0.017          | 0.23<br>(0.04–1.20)      | 0.082          | 0.25<br>(0.04–1.77)                                                | 0.167          |
| Severe culprit lesion calcification | 5.40<br>(1.75–16.8)           | <b>0.03</b>    | 46.1<br>(4.39–485)       | <b>0.01</b>    | 40.1<br>(3.2–498)                                                  | <b>0.04</b>    |
| Eccentric lesion                    | 1.73<br>(0.58–5.16)           | 0.32           | 3.22<br>(0.56–18.5)      | 0.124          | 2.57<br>(0.37–17.6)                                                | 0.355          |
| Bifurcation lesion                  | 1.61<br>(0.39–6.63)           | 0.51           | 1.52<br>(0.25–9.14)      | 0.65           | 1.50<br>(0.22–10.1)                                                | 0.677          |
| <b>Baseline SYNTAX score</b>        |                               |                |                          |                |                                                                    |                |
| Low (0-22)                          | Reference                     | -              | Reference                | -              | Reference                                                          | -              |
| Medium (23-32)                      | 5.91<br>(1.27–27.5)           | 0.024          | 2.41<br>(0.26–22.0)      | 0.26           | 1.48<br>(0.97–27.0)                                                | 0.78           |
| High (≥33)                          | 4.54<br>(0.51–40.3)           | 0.09           | 4.14<br>(0.32–54.0)      | 0.27           | 2.03<br>(0.03–145)                                                 | 0.74           |
| <b>Residual SYNTAX score</b>        |                               |                |                          |                |                                                                    |                |
| Incomplete unacceptable (>8)        | Reference                     | -              | Reference                | -              | Reference                                                          | -              |
| Incomplete acceptable (1-7)         | 1.05<br>(0.30–3.70)           | 0.93           | 1.35<br>(0.12–15.7)      | 0.82           | 2.02<br>(0.14–28.5)                                                | 0.62           |
| Complete revascularisation (0)      | 0.83<br>(0.36–1.93)           | 0.67           | 1.99<br>(0.41–9.57)      | 0.39           | 2.59<br>(0.46–14.4)                                                | 0.27           |

\* Differences in baseline characteristics defined as age, sex, previous myocardial infarction, previous transient ischemic attack or stroke, heart failure, or anaemia.

P≤0.05 are highlighted in bold. OR = odds ratio.

# A large limitation of our study is the small number of patients, particularly at the extremes of Fried Frailty (in the robust and frail groups). As a consequence, the confidence intervals for the odds ratio of certain angiographic characteristics (particularly calcification) are very wide after adjustment.

**Supplementary Table 5.** Variables included and dropped in the fully adjusted multivariate logistic analysis (Model 2).

|                                                  |                                                                                                                           |
|--------------------------------------------------|---------------------------------------------------------------------------------------------------------------------------|
| <b>Variable included</b>                         | Age<br>Sex<br>Previous myocardial infarction<br>Previous transient ischaemic attack or stroke<br>Heart failure<br>Anaemia |
| <b>Variable dropped due to multicollinearity</b> | GRACE 2.0 score<br>New York Heart Association score<br>Charlson co-morbidity index score<br>Haemoglobin                   |
